# Supplementary material for: Foot care in epidermolysis bullosa: evidence‐based guideline
Source: PubMed Central journal article supplement — Br J Dermatol. 2019 Oct 23;182(3):593–604. doi: 10.1111/bjd.18381 (PMC7065089; doi:10.1111/bjd.18381), 2019-10-23

## Socks and Insoles Products

### Adults

**Figure 1:** Sock contains pure silver a naturally occurring element Silver acts as a transmitter removing heat and regulating temperature

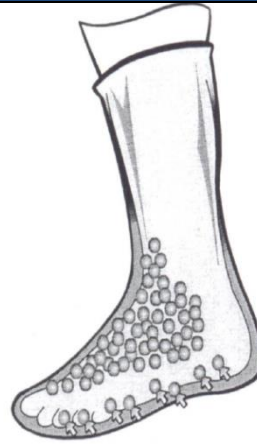

**Figure 2:** Functional orthotics

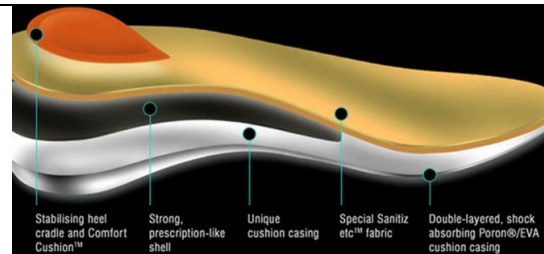

**Figure 3:** Cushioning insoles – Coolsorb. Keep in the fridge.

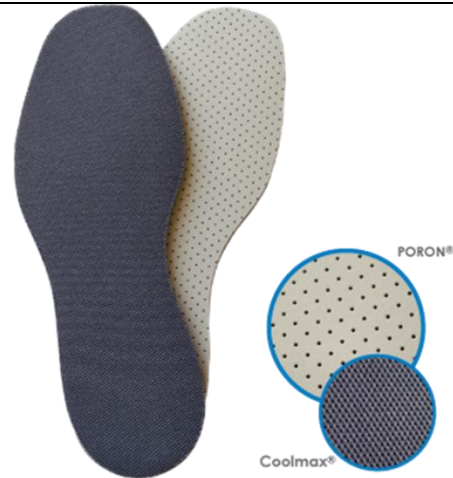

**Figure 4:** Microporous cellular structure allows feet to breathe Absorbs shock Rebounds to original thickness step after step

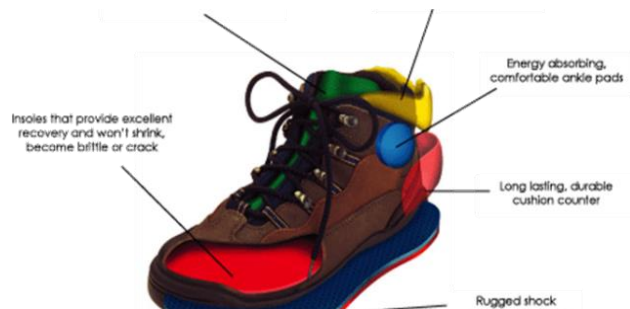

Supplement: BJD-182-593-s003.pdf [file BJD-182-593-s003.pdf]
