# Supplementary material for: Foot care in epidermolysis bullosa: evidence‐based guideline
Source: PubMed Central journal article supplement — Br J Dermatol. 2019 Oct 23;182(3):593–604. doi: 10.1111/bjd.18381 (PMC7065089; doi:10.1111/bjd.18381), 2019-10-23
Supplement: BJD-182-593-s005.pdf [file BJD-182-593-s005.pdf]

## Bespoke Footwear

The podiatry team provide bespoke footwear that are tailored to meet each patients individual needs.

We work closely with local orthotics and some of the elite footwear manufacturers across the country to provide personalised and stylish footwear.

Safety shoes/footwear are made to measure and adhere to the national safety requirements.

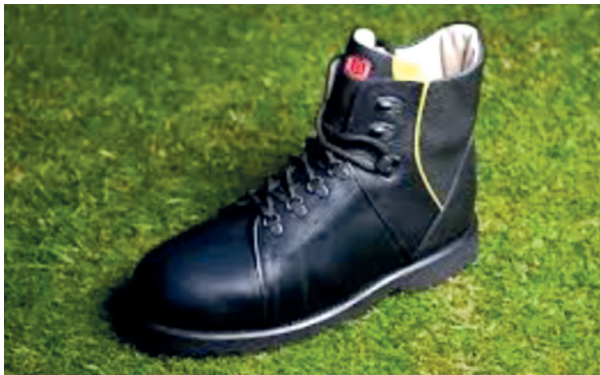

Seamless footwear: can cut down on blistering and friction.

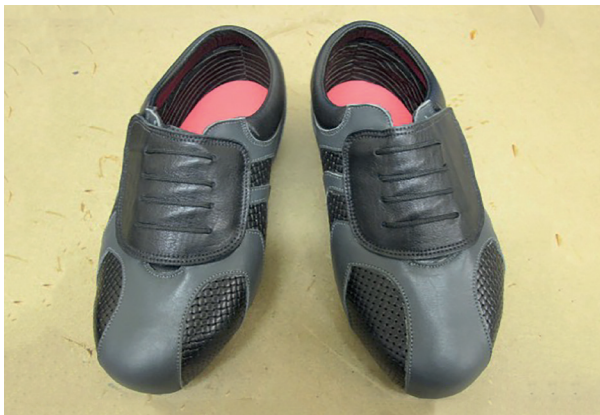

## E.B. Podiatrists

The Podiatrists are part of the multidisciplinary team.

We specialise in providing an individual podiatry assessment for each patient and then implement appropriate specialist treatment in order to alleviate symptoms and promote optimum mobility.

We also specialise in biomechanics and can provide bespoke insoles and/or footwear to help improve long term foot health and comfort for our patients.

## Contact us

0121 424 5232  
[ebteamsolihull@heartofengland.nhs.uk](mailto:ebteamsolihull@heartofengland.nhs.uk)

# The E.B. Podiatry Team

# E.B. Podiatry

**Blistering is a regular occurrence and usually can't be prevented. However, with advice and treatment from our team mobility can be greatly improved.**

## Regular podiatry care

There maybe increased prevalence of hyperkeratosis (thick hardened skin) and blistering on the soles of the feet. We can provide ongoing Podiatry care or referrals to local podiatrists with specific technical advice.

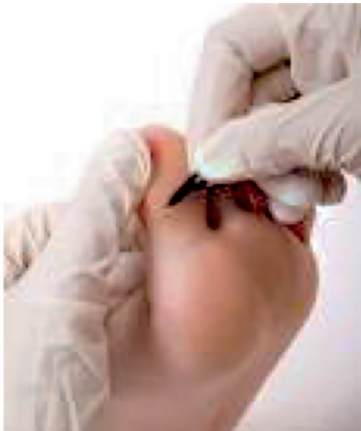

Certain products such as padding, strapping and E.B. specific hosiery are also available through our service. We are continually trying to source and sample cutting edge materials in order to optimise the quality of the service we provide.

## Further advice

The aim of the Podiatry team is to try and alleviate symptoms, by providing footwear that the patient is both comfortable and confident with and in turn providing relief from pain.

The footwear we offer our patients is extremely varied and is ultimately based on individual needs and personal preference.

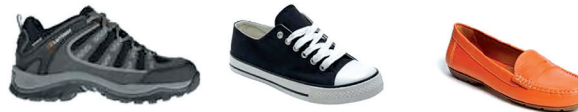

Once footwear has been reviewed and discussed we will then assess the possible additional benefit of in-shoe orthotics.

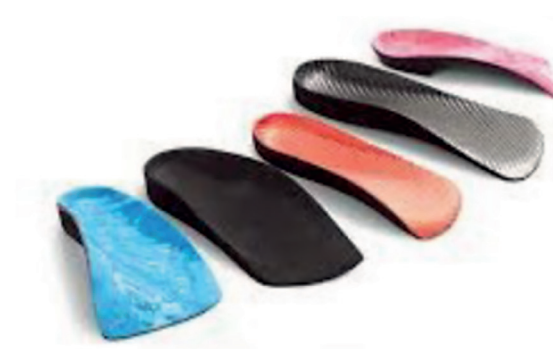

Such devices are varied and will be individually tailored and prescribed by us depending on symptoms, footwear and activity.

## Bespoke Orthotics

As part of our desire to provide bespoke interventions for each patient, we also offer an in shoe plantar pressure measurement (tekscan) service.

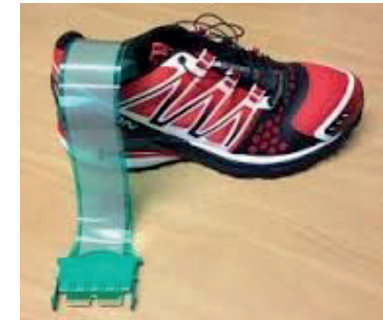

This entails using electronic insoles inserted into the patients current footwear which provides readouts of varying pressures under the soles of the feet as shown below.

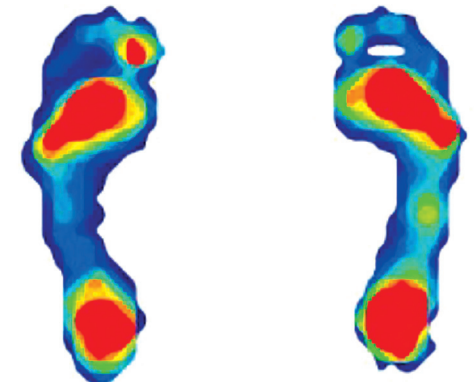

With this information we are then able to produce custom made off-loading insoles to help prevent or reduce blister build up.
